# Supplementary figures and images for: A Geometric Unification of Distributionally Robust Covariance Estimators: Shrinking the Spectrum by Inflating the Ambiguity Set
Source: Atypon-hosted journal article supplement (doi:10.1287/opre.2024.1071), 2024-05-31

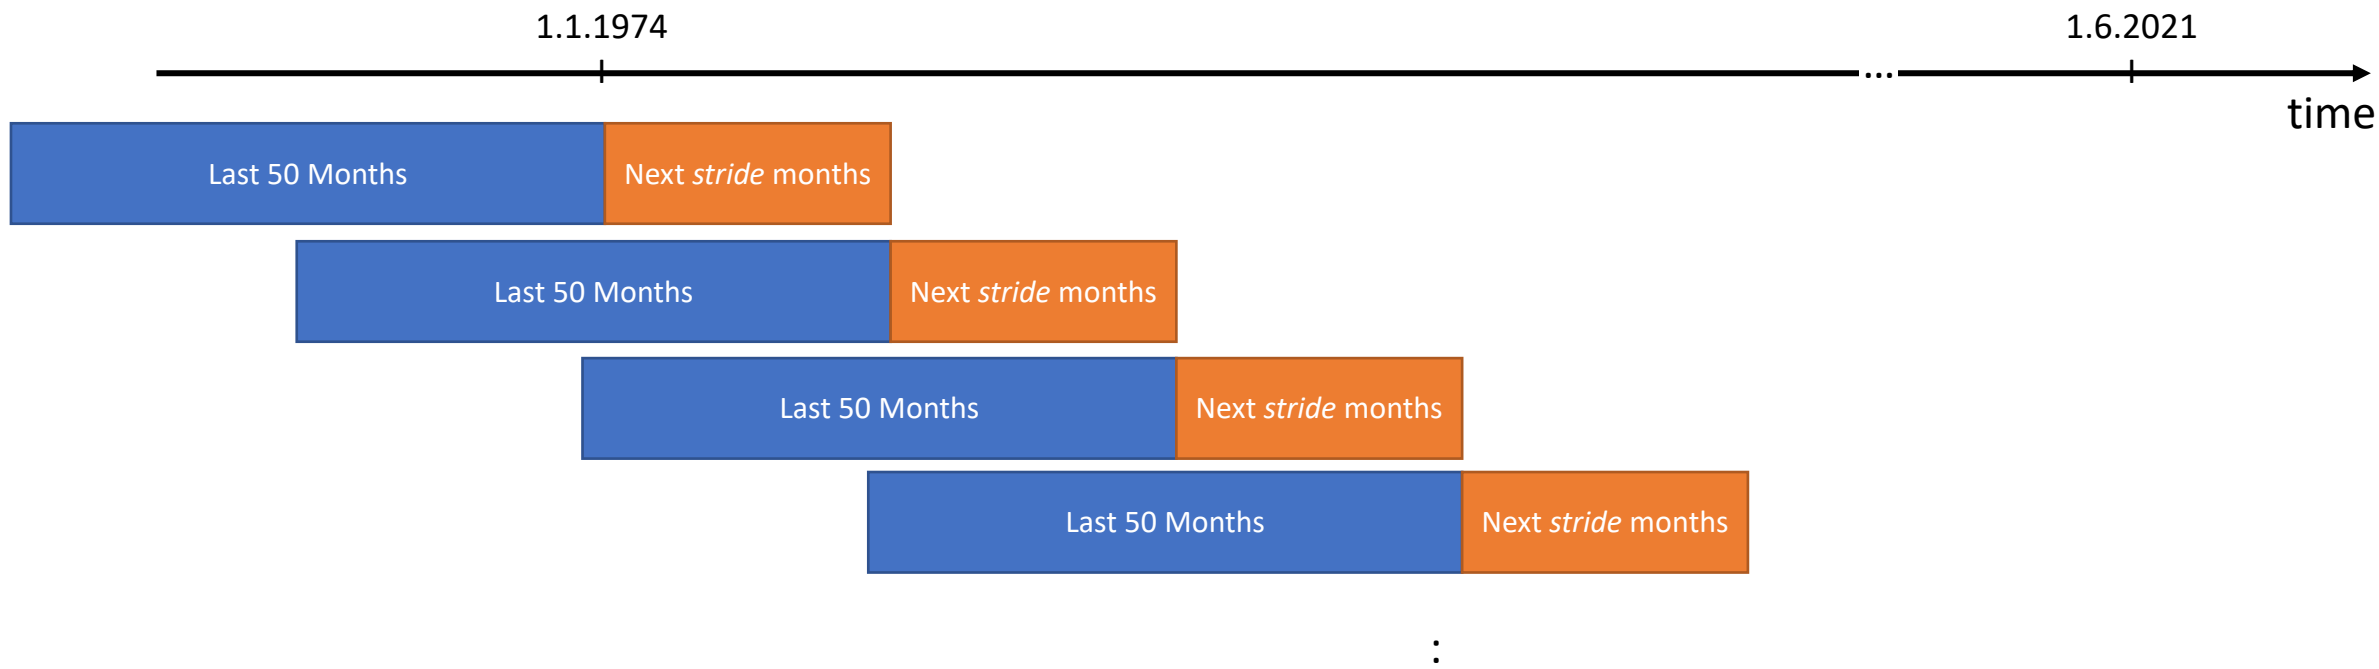

Supplement: opre.2024.1071.cd.zip [file plot_setup.pdf › covariance_DRO/python/plots/plot_setup.pdf]
